# Supplementary material
Source: PubMed Central journal article supplement (PMC11072604)
Supplement: 18_2021_4023_MOESM1_ESM.pdf [file 18_2021_4023_MOESM1_ESM.pdf]

## Supplementary tables and figures

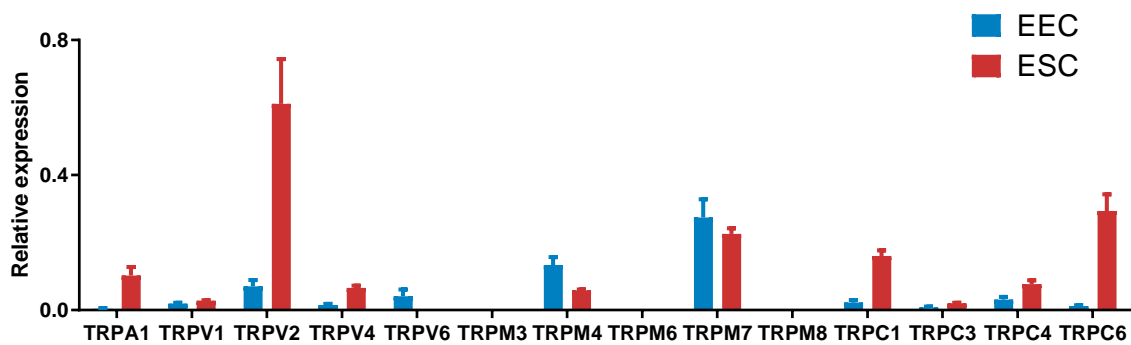

**Supplementary figure 1:** Quantitative RT-PCR showing TRP channel mRNA expression (TRPA1, TRPV1, TRPV2, TRPV4, TRPV6, TRPM3, TRPM4, TRPM6, TRPM7, TRPM8, TRPC1, TRPC3, TRPC4 and TRPC6, in EEC and ESC. Results are shown as mean  $\pm$  SEM relative expression to the geometric mean of housekeeping genes HPRT and PGK (published). N=5 p.s. Data used from own earlier publications[1, 2].

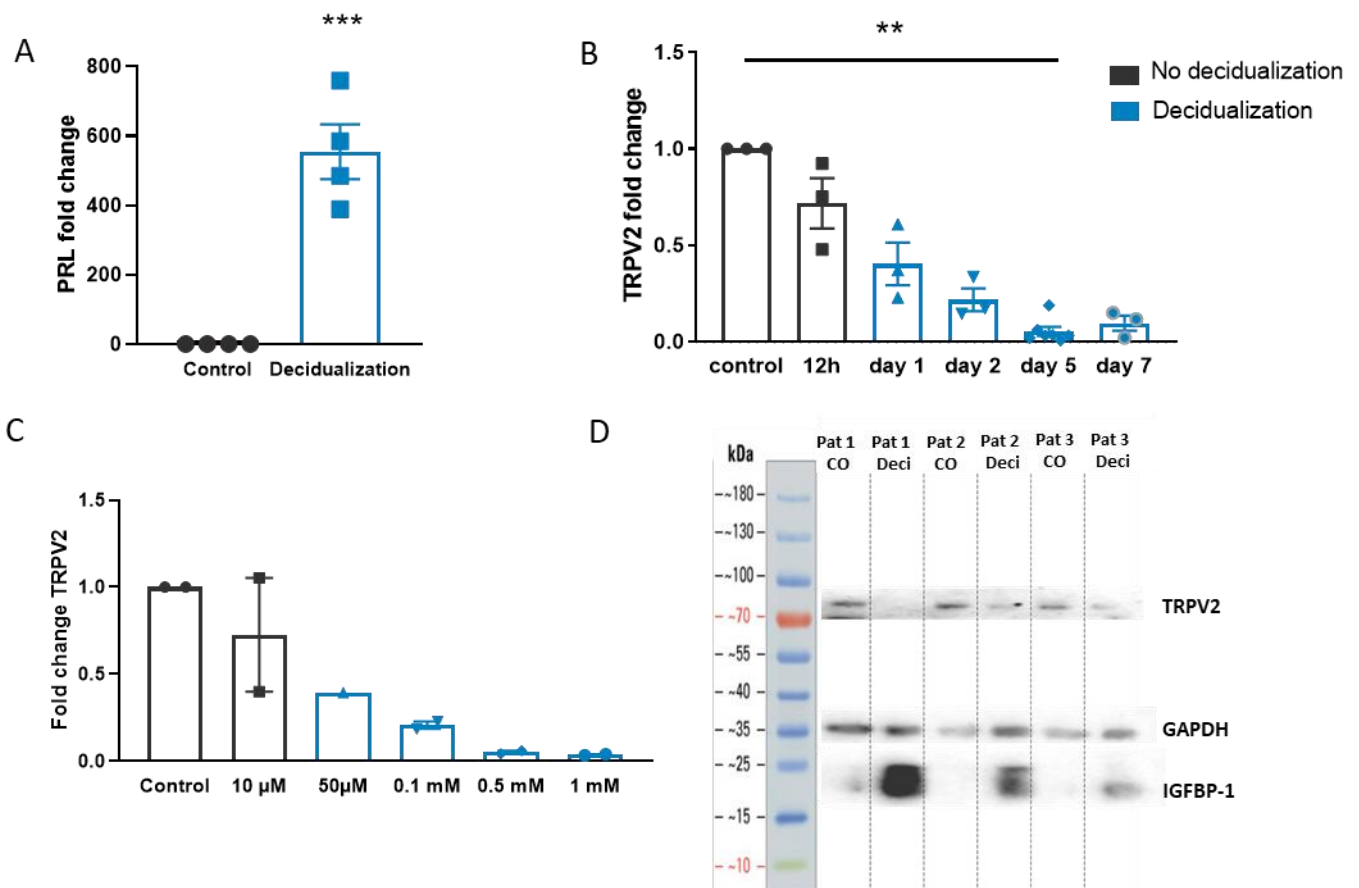

**Supplementary figure 2: TRP channels in decidualization.** **A)** Validation of *in vitro* decidualization of HESC. Fold change of PRL mRNA expression after decidualization. \*\*\*\* p < 0,0001 using Wilcoxon signed-rank-test on  $\Delta$ CT values. **B)** Fold change of TRPV2 in response to 12h, 1 day, 2 days, 5 days and 7 days of *in vitro* decidualization. \*\* p < 0,01 using Kruskal-wallis test + Dunn's multiple comparison test on  $\Delta$ Ct values. N=3-7 p.s **C)** Fold change of TRPV2 in response to 10  $\mu$ M, 50  $\mu$ M, 0,1 mM, 0,5 mM and 1 mM 8-Br-cAMP. N=1-2 p.s. All data is shown as mean  $\pm$  SEM. **D)** Western blot displaying downregulation of TRPV2 protein expression after decidualization in ESC. GAPDH was used as loading control and IGFBP-1 upregulation demonstrates successful decidualization.

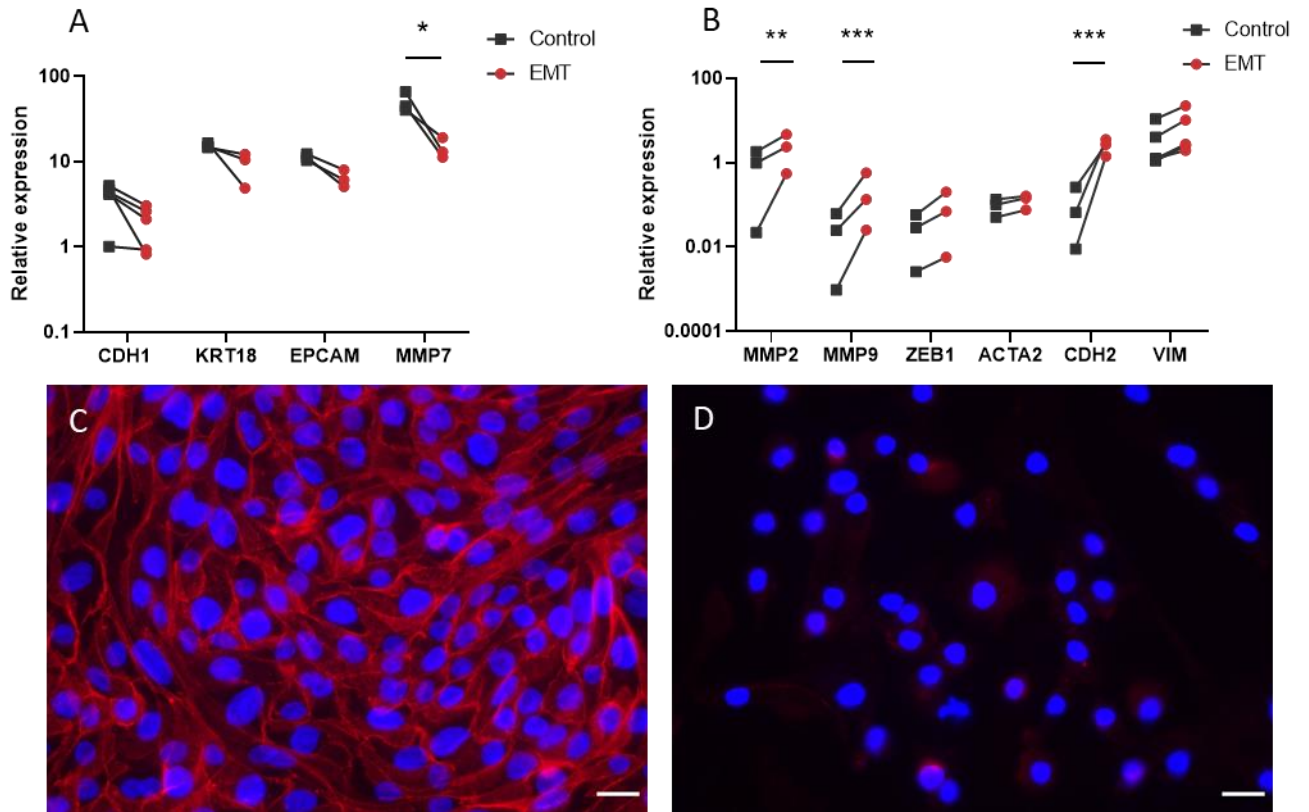

**Supplementary figure 3: Validation of *in vitro* EMT induction in EEC. A+B)** Quantitative RT-PCR showing mRNA expression of epithelial (CDH1, KRT18, EPCAM, MMP7) and mesenchymal (MMP2, MMP9, ZEB1, ACTA, CDH2, VIM) markers shown as relative expression to housekeeping genes HPRT and PGK. \*  $p < 0,05$ , \*\*  $p < 0,01$ , \*\*\*  $p < 0,001$  using 2-way ANOVA and Sidak's multiple comparison test on  $\Delta$ CT values. N=3-5 **C+D)** Immunofluorescence staining (magnification: 40x) of the epithelial marker E-cadherin in untreated (**C**) and treated EEC (**D**). Scalebar = 20  $\mu$ M

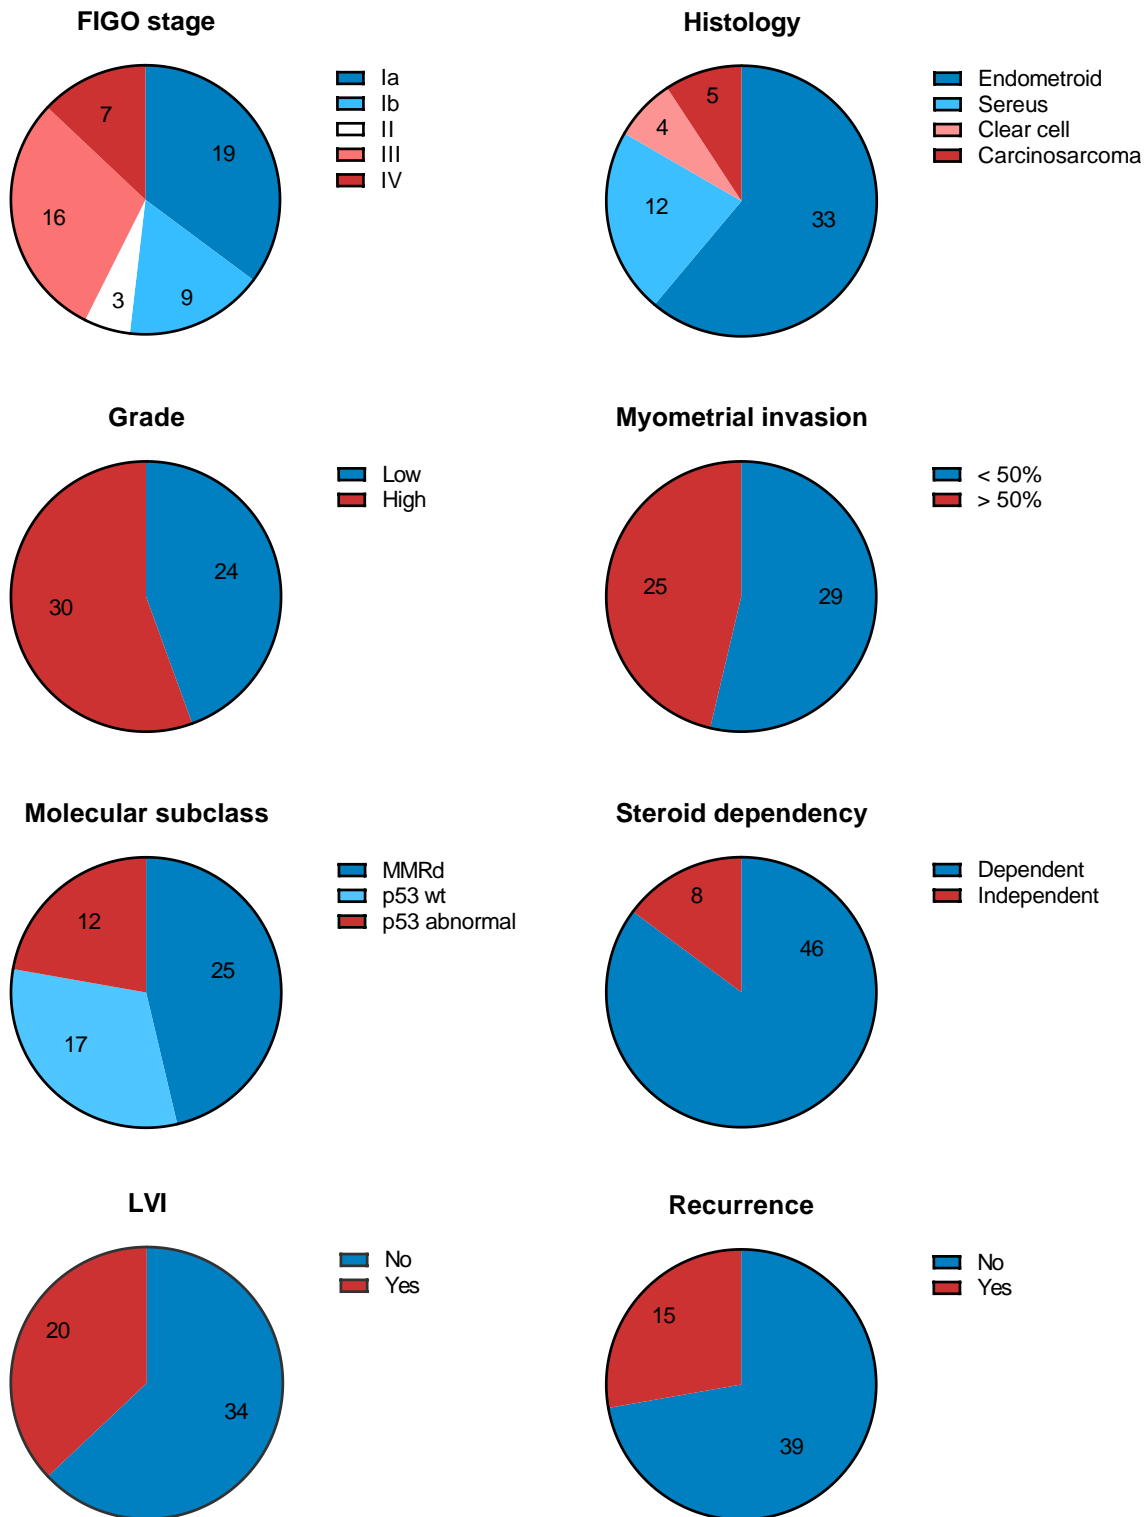

**Supplementary figure 4: Patient statistics. A-H)** Pie charts displaying number of patients per pathophysiological category: FIGO stage (A), histology (B), grade (C), myometrial invasion (D), molecular subclass (E), steroid dependency (F), LVI (G) and recurrence (H).

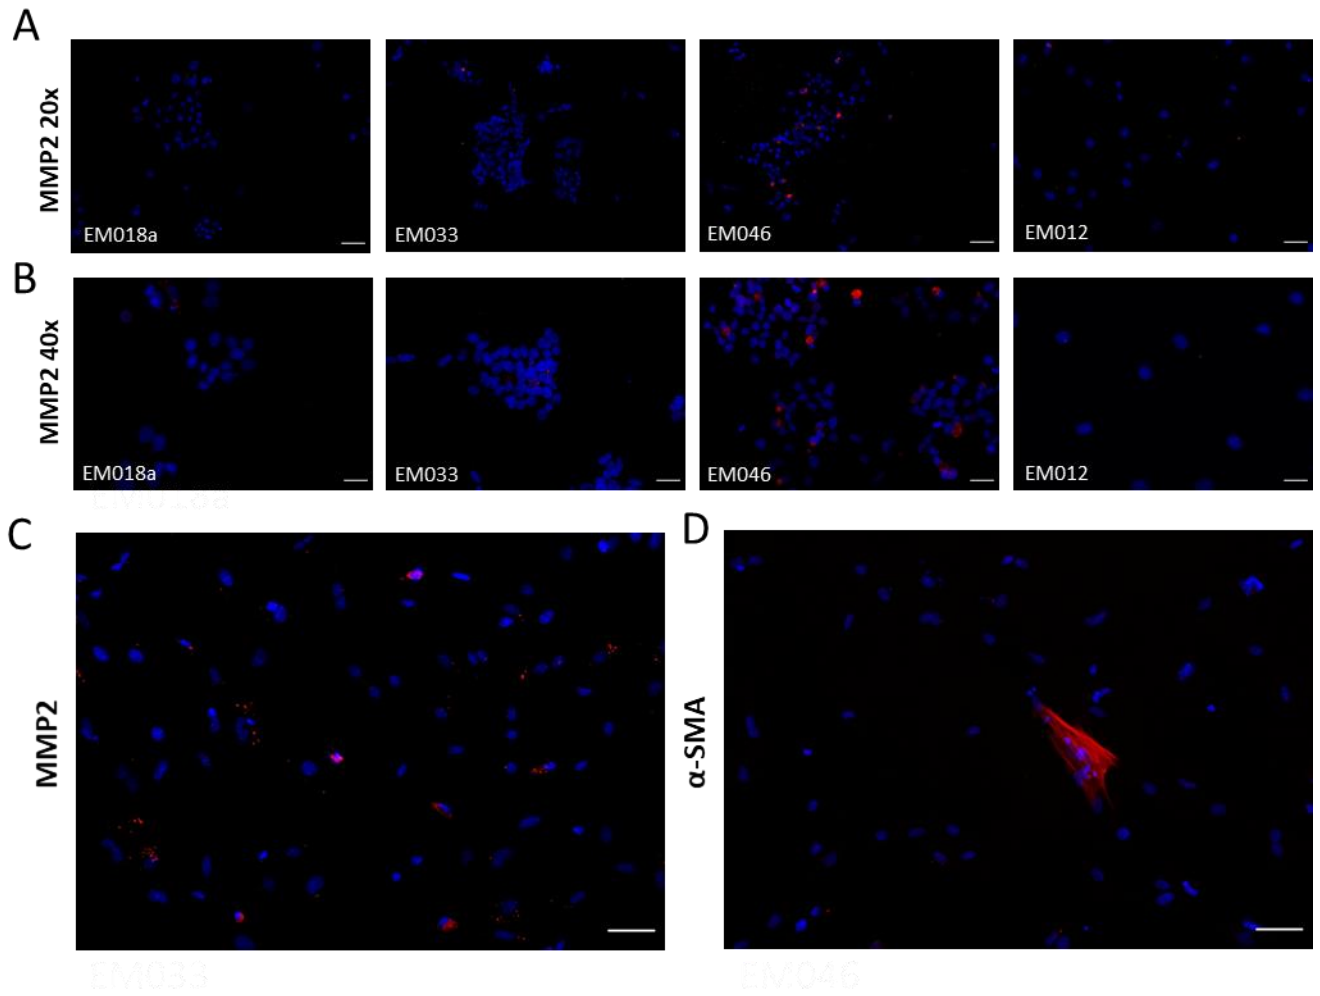

**Supplementary figure 5: Characterization of EC cell cultures.** **A)** Immunofluorescence stainings (magnification: 20x) of the mesenchymal marker MMP2 in EM018a, EM012, EM033 and EM046 cells. Scale bar = 50  $\mu\text{m}$ . **B)** Immunofluorescence stainings (magnification: 40x) of the mesenchymal marker MMP2 in EM018a, EM012, EM033 and EM046 cells. Scale bar = 25  $\mu\text{m}$ . **C)** Immunofluorescence staining (magnification: 20x) of the mesenchymal marker MMP2 in ESC cells. Scale bar = 50  $\mu\text{m}$ . **D)** Immunofluorescence staining (magnification: 20x) of the mesenchymal marker  $\alpha$ -smooth muscle actin in ESC cells. Scale bar = 50  $\mu\text{m}$

|       | R    | R Square | Adjusted R Square | Std. Error of the Estimate | Sig.     |
|-------|------|----------|-------------------|----------------------------|----------|
| TRPV2 | .839 | .703     | .634              | .77015                     | .000 *** |
| TRPV4 | .443 | .196     | .010              | .96833                     | .419     |
| TRPV6 | .561 | .314     | .155              | 2.27337                    | .061     |
| TRPC1 | .844 | .713     | .646              | 1.27964                    | .000 *** |
| TRPC4 | .804 | .646     | .564              | 1.34367                    | .000 *** |
| TRPC6 | .634 | .402     | .263              | 1.49358                    | .008 **  |
| TRPM4 | .535 | .287     | .121              | 1.11157                    | .105     |
| TRPM7 | .632 | .399     | .259              | .66106                     | .008 **  |

**Supplementary Table 1:** SPSS output of multiple linear regression analysis of TRP channel expression (dependent variable) and marker genes (independent variables) in primary biopsies displaying R, R square, adjusted R square, SE and p-values for each TRP channel. . \* p < 0,05, \*\* p < 0,01, \*\*\* p < 0,001

|       |       | B     | SE   | t      | Sig.     |
|-------|-------|-------|------|--------|----------|
| TRPV2 | CDH1  | -.223 | .128 | -1.748 | .080     |
|       | EPCAM | .025  | .149 | .169   | .866     |
|       | KRT18 | .160  | .159 | 1.007  | .314     |
|       | MMP7  | -.006 | .047 | -.138  | .890     |
|       | CDH2  | -.093 | .066 | -1.406 | .160     |
|       | CTSB  | .227  | .129 | 1.765  | .078     |
|       | ACTA2 | .043  | .093 | .463   | .643     |
|       | MMP2  | .233  | .105 | 2.221  | .026 *   |
|       | MMP9  | .231  | .049 | 4.736  | .000 *** |
|       | ZEB1  | .147  | .172 | .853   | .394     |
| TRPC1 | CDH1  | .069  | .212 | .326   | .744     |
|       | EPCAM | .121  | .248 | .489   | .625     |
|       | KRT18 | -.179 | .265 | -.677  | .498     |
|       | MMP7  | -.372 | .078 | -4.771 | .000 *** |
|       | CDH2  | .094  | .109 | .855   | .393     |
|       | CTSB  | .659  | .214 | 3.083  | .002 **  |
|       | ACTA2 | -.038 | .154 | -.248  | .804     |
|       | MMP2  | .032  | .175 | .186   | .853     |
|       | MMP9  | -.188 | .081 | -2.324 | .020 *   |
|       | ZEB1  | 1.102 | .285 | 3.861  | .000 *** |

**Supplementary Table 2:** SPSS output of multiple linear regression analysis of TRP channel expression (dependent variable) and marker genes (independent variables) in primary biopsies displaying B coefficient, SE, t- and p-values for all marker genes in the model. \* p < 0,05, \*\* p < 0,01, \*\*\* p < 0,001

|       | R    | R Square | Adjusted R Square | Std. Error of the Estimate | Sig.    |
|-------|------|----------|-------------------|----------------------------|---------|
| TRPV2 | .931 | .867     | .810              | .72893                     | .002 ** |
| TRPV4 | .797 | .636     | .595              | .53922                     | .003 ** |
| TRPC1 | .853 | .728     | .659              | 1.07810                    | .006 ** |
| TRPC4 | .666 | .443     | .381              | 1.35545                    | .025 *  |
| TRPC6 | .772 | .596     | .495              | .87412                     | .027 *  |
| TRPM4 | .623 | .388     | .320              | 1.00119                    | .041 *  |

**Supplementary Table 3:** SPSS output of multiple linear regression analysis of TRP channel expression (dependent variable) and significantly correlated marker genes (independent variables) in metastatic biopsies displaying R, R square, adjusted R square, SE and p-values for each TRP channel. \* p < 0,05, \*\* p < 0,01

|       |       | B     | SE   | t     | Sig.    |
|-------|-------|-------|------|-------|---------|
| TRPV2 | MMP9  | .188  | .094 | 2.001 | .085    |
|       | ZEB1  | .990  | .318 | 3.113 | .017 *  |
|       | ACTA  | -.076 | .212 | -.355 | .733    |
| TRPV4 | CTSB  | .512  | .129 | 3.961 | .003 ** |
| TRPC1 | ZEB1  | .902  | .367 | 2.459 | .039 *  |
|       | MMP2  | .253  | .183 | 1.384 | .204    |
| TRPC4 | MMP2  | .468  | .175 | 2.676 | .025 *  |
| TRPC6 | MMP2  | .246  | .140 | 1.756 | .117    |
|       | CTSB  | .348  | .260 | 1.335 | .219    |
| TRPM4 | EPCAM | .234  | .098 | 2.387 | .041 *  |

**Supplementary Table 4:** SPSS output of (multiple) linear regression analysis of TRP channel expression (dependent variable) and significantly correlated marker genes (independent variables) in metastatic biopsies displaying B coefficient, SE, t- and p-values for all marker genes in the model. \* p < 0,05, \*\* p < 0,01

|                  | B     | SE   | Sig.   | Exp(B) (OR) |
|------------------|-------|------|--------|-------------|
| TRPV2 expression | -.721 | .360 | .046 * | .486        |
| Grade            | 2.126 | .895 | .018 * | 8.382       |

**Supplementary Table 5:** Logistic regression analysis of TRPV2 expression and tumor grade (predictor variables) and disease recurrence (independent variable) displaying B coefficient, SE, p-values and odds ratio for all predictor variables in the model. \* p < 0,05

|                     | B     | SE   | Sig.   | Exp(B) (OR) |
|---------------------|-------|------|--------|-------------|
| TRPV2 expression    | -.662 | .303 | .030 * | .516        |
| CTSB expression     | -.678 | .324 | .037 * | .508        |
| MMP9 expression     | -.277 | .134 | .038 * | .758        |
| Grade (Low vs High) | 2.047 | .831 | .014 * | 7.747       |

**Supplementary Table 6:** Logistic regression analysis of TRPV2, CTSB, MMP9 expression and tumor grade (predictor variables) and disease recurrence (independent variable) displaying B coefficient, SE, p-values and odds ratio for all predictor variables in the model. \*  $p < 0,05$

|        | M/E ratio |
|--------|-----------|
| EM018a | 0,5714286 |
| EM033  | 1,1428571 |
| EM046  | 1,7142857 |
| EM012  | 1,047619  |

**Supplementary Table 7:** M/E ratio for EC cancer cell cultures

1. Hennes, A., et al., *Functional expression of the mechanosensitive PIEZO1 channel in primary endometrial epithelial cells and endometrial organoids*. Scientific Reports, 2019. **9**.
2. De Clercq, K., et al., *Functional expression of transient receptor potential channels in human endometrial stromal cells during the luteal phase of the menstrual cycle*. Hum Reprod, 2015. **30**(6): p. 1421-36.
